## The role of nitric oxide pathway in arginine transport and growth of IPEC-1 cells

Hao Xiao<sup>1,2</sup>, Liming Zeng<sup>1,3</sup>, Fangyuan Shao<sup>4</sup>, Bo Huang<sup>1,2</sup>, Miaomiao Wu<sup>5</sup>, Bie Tan<sup>1</sup>, Yulong Yin<sup>1,6,7</sup>

<sup>1</sup>National Engineering Laboratory for Pollution Control and Waste Utilization in Livestock and Poultry Production, Key Laboratory of Agro-ecological Processes in Subtropical Region, Institute of Subtropical Agriculture, Chinese Academy of Sciences, Changsha, China

<sup>2</sup>University of the Chinese Academy of Sciences, Beijing, China

<sup>3</sup>Science College of Jiangxi Agricultural University, Nanchang, China

<sup>4</sup>Faculty of Health Sciences, University of Macau, Macau SAR, China

<sup>5</sup>Diagnostic Medicine/Pathobiology, College of Veterinary Medicine, Kansas State University, Manhattan, KS, USA

<sup>6</sup>Laboratory of Animal Nutrition and Human Health, School of Biology, Hunan Normal University, Changsha, China

<sup>7</sup>College of Animal Science, South China Agricultural University, Guangzhou, China

**Correspondence to:** Bie Tan, **email:** bietan@isa.ac.cn  
Yulong Yin, **email:** yinyulong@isa.ac.cn

**Keywords:** arginine, nitric oxide synthase, mTOR, intestinal porcine epithelial cells (IPEC)

**Received:** December 12, 2016

**Accepted:** March 08, 2017

**Published:** March 16, 2017

Copyright: Xiao et al. This is an open-access article distributed under the terms of the Creative Commons Attribution License (CC-BY), which permits unrestricted use, distribution, and reproduction in any medium, provided the original author and source are credited.

### ABSTRACT

**L-Arginine itself and its metabolite-nitric oxide play great roles in intestinal physiology. However, the molecular mechanism underlying nitric oxide pathway regulating L-Arginine transport and cell growth is not yet fully understood. We report that inhibition of nitric oxide synthase (NOS) significantly induced cell apoptosis ( $p < 0.05$ ), and promoted the rate of Arginine uptake and the expressions of protein for CAT-2 and  $\gamma^+$ LAT-1 ( $p < 0.05$ ), while reduced protein expression of CAT-1. And NOS inhibition markedly decreased the activation of mammalian target of rapamycin (mTOR) and PI3K-Akt pathways by Arginine in the IPEC-1 cells ( $p < 0.05$ ). Taken together, these data suggest that inhibition of NO pathway by L-NAME induces a negative feedback increasing of Arginine uptake and CAT-2 and  $\gamma^+$ LAT-1 protein expression, but promotes cell apoptosis which involved inhibiting the activation of mTOR and PI3K-Akt pathways.**

### INTRODUCTION

Arginine is a semi-essential amino acid that serve as an important role in diverse physiological function ranging from regulation of animal nutrition metabolism to the process of growth and development [1–5]. There is evidence showing that arginine stimulates anabolic cell pathways, such as protein synthesis, proliferation, and migration [3, 6, 7]. In rat intestinal epithelial cell, arginine stimulates downstream targets of mTOR-p70 ribosomal protein S6 (p70 S6) kinase and eukaryotic initiation factor 4E-binding protein 1 (4E-BP1) [8]. Recent studies showed that arginine stimulated the mTOR signaling pathway and protein synthesis in porcine trophoblast cells [9] and LPS-treated enterocytes [3].

Arginine is also a substrate for endothelial nitric oxide synthase (eNOS) to produce the important vasoprotective molecule nitric oxide (NO) to regulate vital metabolic pathways [10]. NO plays great roles in regulation of arginine in growth and proliferation of intestinal porcine epithelial cell (IPEC). Arginine could stimulate cell migration via a mechanism requiring NO and phosphorylation of p70 S6 kinase [11]. Further study determined that the arginine-mediated activation of protein synthesis and mTOR pathway is independent on NO [12]. However, the effects of L-Arginine-NO pathway in the proliferation of cell, the expression of arginine transporters and the activation of mTOR signaling pathway have not been well characterized.

We hypothesized that NO pathway might play an important role in the regulation of Arginine utilization and cell growth in the intestinal porcine epithelial cells (IPEC-1). The present study was designed to test this hypothesis using L-NAME to inhibit L-Arginine-NO pathway.

## RESULTS

### L-NAME inhibits the Arginine-NO pathway

L-NAME was used to inhibit Arginine-NO pathway, and relative proteins of eNOS and the content of NO were measured. Compared with the control (100  $\mu$ M Arginine group), 350  $\mu$ M Arginine medium significantly promoted ( $p < 0.05$ ) the content of NO and the relative protein levels of total eNOS. The addition of L-NAME markedly decreased ( $p < 0.05$ ) the content of NO and the relative protein levels of total eNOS (Figure 1).

### Inhibition of Arginine-NO pathway induces cell apoptosis

As illustrated in Figure 2, arginine at 350  $\mu$ M increased ( $p < 0.05$ ) cell proliferation compared with the control. Compared with the control, addition of L-NAME increased ( $p < 0.05$ ) cell apoptosis, while no effect on cell proliferation, the percentage of cells in G<sub>1</sub> and S phase.

### Inhibition of Arginine-NO pathway promotes rate for arginine transportation

As shown in Figure 3, we found that arginine at 350  $\mu$ M increased ( $p < 0.05$ ) the arginine uptake and protein levels of CAT-1 and CAT-2 compared with the control. Addition of L-NAME significantly improved ( $p < 0.05$ ) the arginine uptake and the mRNA level of CAT-2 and y+LAT-1, but decreased ( $p < 0.05$ ) protein levels of CAT-1 compared with the control.

### Inhibition of Arginine-NO pathway inhibits the PI3K-Akt-Bcl2 pathway and mTOR pathway

Compared with the control, 350  $\mu$ M Arginine medium increased ( $p < 0.05$ ) 4EBP1, phosphorylated 4EBP1 and phosphorylated p70S6 kinase, while addition of L-NAME to 100  $\mu$ M Arginine medium significantly decreased ( $p < 0.05$ ) protein levels for mTOR, phosphorylated mTOR, phosphorylated PI3K, Akt, phosphorylated Akt and Bcl2. Addition of L-NAME to 350  $\mu$ M Arginine medium decreased ( $p < 0.05$ ) protein levels for 4EBP1, phosphorylated 4EBP1 and phosphorylated p70S6 kinase (Figure 4, 5).

## DISCUSSION

As an indispensable amino acid in almost all neonatal

mammals, arginine has an important role in intestinal physiology and somatic growth [13]. Our previous study found that elevated arginine concentrations enhanced DNA synthesis, cell-cycle progression, and mitochondrial bioenergetics in LPS-treated intestinal epithelial cells through mechanisms involving activation of the PI3K-Akt pathway [14]. And Arginine supplementation could decrease expression of the proteins for NF- $\kappa$ B, MAPK, and PI3K-Akt signaling pathways but activated p38 and c-Jun N-terminal protein kinase in the jejunum and the ileum [15]. Lenaerts et al. reported that arginine regulated the expression of proteins of proliferation and apoptosis in Caco-2 cells [16]. Our results showed that Arginine could markedly promote the proliferative capacity of IPEC-1 cells, while addition of L-NAME has no effect on DNA synthesis and cell cycle. Moreover, phosphatidylinositol 3-kinase (PI3K) and Akt are both well-known upstream regulators of the mTOR signaling pathway in mammalian cells [17], and the PI3K/Akt pathway provides essential signaling for cell survival and proliferation. The BCL-2 family of proteins are both pro- as well as anti-apoptotic molecules and BCL-2 is an anti-apoptotic molecule [18]. Previous study showed that long term overproduction of NO released from arginine could enhance apoptosis by activating the caspase family proteases, producing the release of mitochondrial cytochrome c [19]. According to our flow cytometry results, L-NAME may induce the cell apoptosis. Then relative protein expressions were suggested that L-NAME might induce the cell apoptosis via inhibiting the PI3K-Akt-Bcl2 pathway.

Although arginine synthesis in adult swine is through the intestinal-renal axis, the neonatal intestine contains all the enzymes necessary to synthesize and transport arginine [20]. Arginine transport involves the system y<sup>+</sup> (a high-affinity, Na<sup>+</sup>-independent transporter, CAT-1, CAT-2, CAT-3, CAT-4) and Na-dependent transporters (e.g., b<sup>0,+</sup>, B<sup>0,+</sup>, and y<sup>+</sup>L) in a cell-specific manner [21]. For intestinal epithelial cells, 70% Arginine is transported through the system y<sup>+</sup>. In this study, we found that increasing arginine and addition of L-NAME could both promote Arginine uptake. In order to research the regulatory mechanism, relative arginine transporters were determined. It reported that arginine uptake could be increased by activation of the inducible NOS (iNOS), associated with upregulation of CAT-2 in rats. And aortic arginine uptake is attenuated by inhibiting eNOS in hypercholesterolemic rats [22]. According to this present study, addition of L-NAME was found to increase the expressions of CAT-2 and y+LAT-1, suggesting that L-NAME might increase arginine influx via increasing the the expressions of CAT-2 and y+LAT-1.

To verify whether arginine directly increase the activation of mTOR signaling pathways and the interaction of arginine uptake and mTOR pathway, the relative protein was determined. Ban et al. and

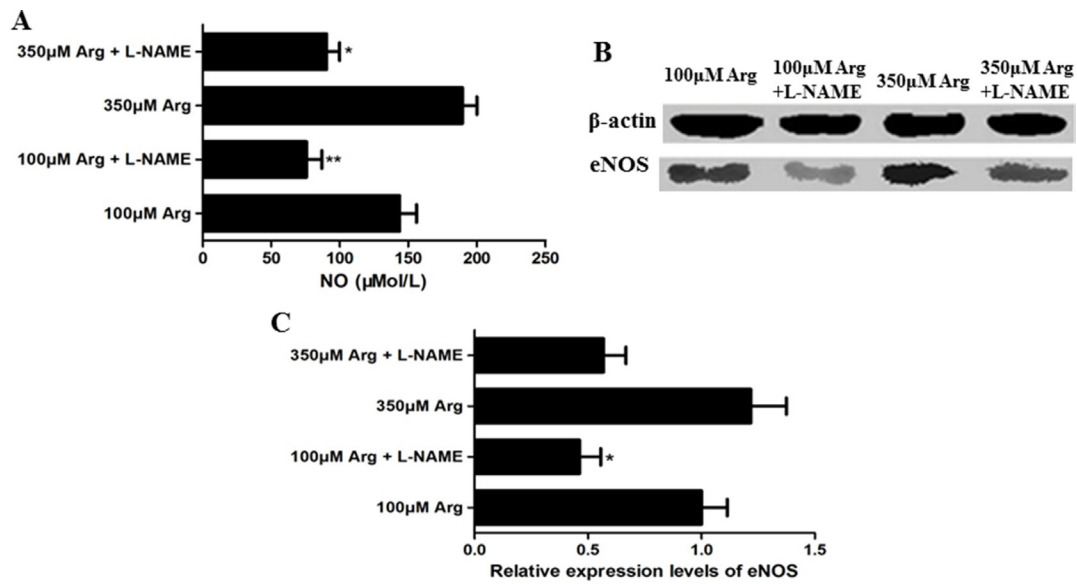

**Figure 1: Effects of L-NAME on the Arg-NO pathway.** (A) Effects of L-NAME on the content of NO. (B) Expression of phosphorylated eNOS was analyzed by western blotting, with β-actin used as the internal control. (C) Relative protein levels for phosphorylated eNOS. Cells were treated with 100 µM Arg, 350 µM Arg, 100 µM Arg+400 µM L-NAME, 350 µM Arg+400 µM L-NAME. Data are the mean ± SEM of at least three independent experiments. \* $P < 0.5$  and \*\* $P < 0.01$ .

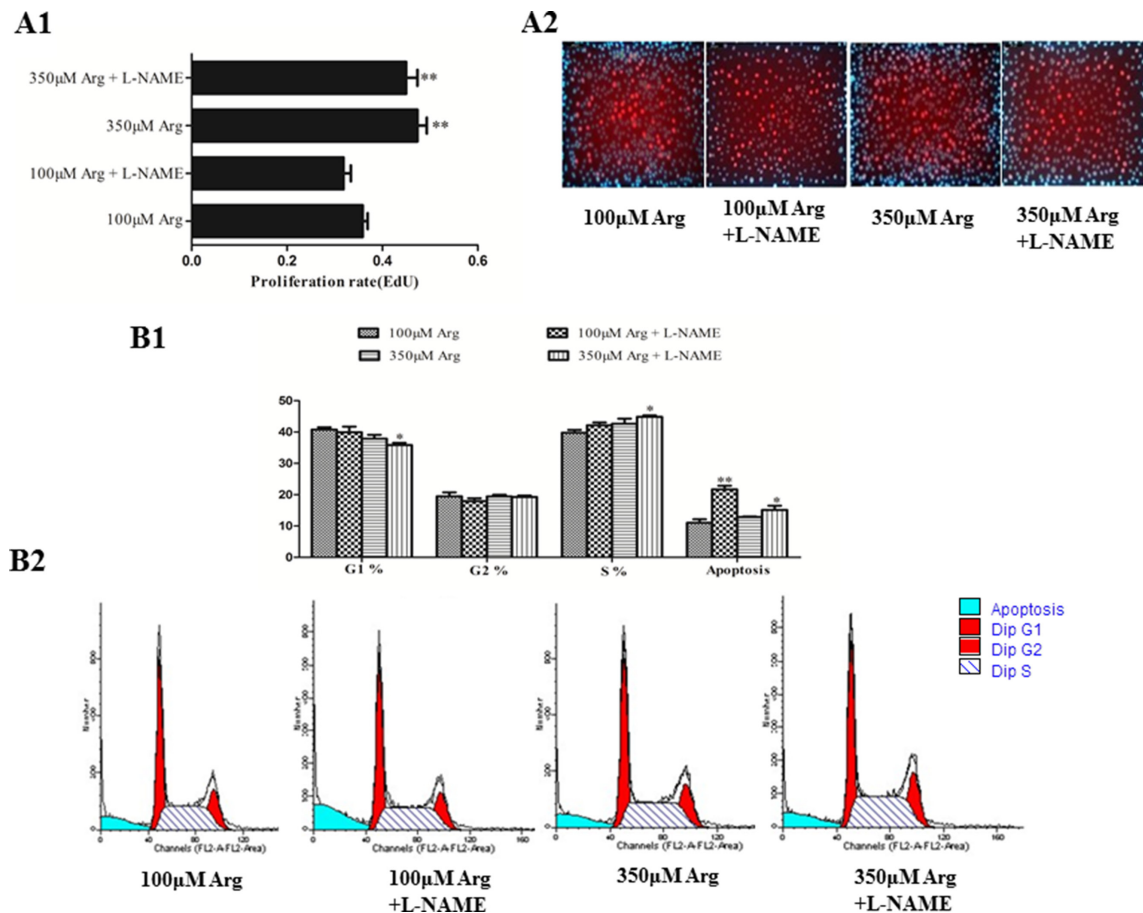

**Figure 2: Effects of inhibition of Arg-NO pathway on cell proliferation.** (A) The EdU measurement. (B) Effects of inhibition of Arg-NO pathway on cell cycle distribution. Cells were treated with 100 µM Arg, 350 µM Arg, 100 µM Arg+400 µM L-NAME, 350 µM Arg+400 µM L-NAME. Data are the mean ± SEM of at least three independent experiments. \* $P < 0.5$  and \*\* $P < 0.01$

Rhoads et al. found that arginine could activate mTOR signaling pathways in intestinal epithelial cells [8, 23]. Tan et al. reported that Arginine could increase the expressions of phosphorylation of mTOR, S6K1 and 4EBP1 in IPEC-1 cells [3]. The present study shows that Arginine promotes the expressions of mTOR signaling pathways proteins, which is consistent with the previous study, and addition of L-NAME reduces the relative protein expressions of mTOR pathway. The previous study found that Arginine showed the relative increase (42.2%) in intracellular pools by inhibiting mTOR [24]. Visigalli et al. found that rapamycin would stimulate arginine influx through CAT2 transporters and mTOR activity might be associated with the repression of CAT2 expression at mRNA and protein level [25]. In our study, L-NAME could inhibit mTOR pathway, suggesting that L-NAME might promote the expressions of  $\gamma$ -CAT-2 by inhibiting mTOR pathway

In conclusion, these findings indicated that Arginine-NO pathway could regulate cell growth and proliferation by inhibiting mTOR pathway and promoting PI3K-Akt-Bcl2 pathway and increase arginine influx via increasing the expressions of CAT-2 and  $\gamma$ -LAT-1. These effects depended on the concentration of arginine supplementation. These results provide effective theoretical basis of Arginine application in piglets nutrition and also provide reference for using Arginine to remedy human intestinal disease.

## MATERIALS AND METHODS

### Reagents and cell culture

Cell culture was done according to a previous study [3]. Dulbecco's modified Eagle's F12 Ham medium (DMEM-F12), fetal bovine serum (FBS), and antibiotics were procured from Invitrogen (Grand Island, NY, USA). Epidermal growth factor was obtained from BD Biosciences (Bedford, MA, USA), and plastic culture plates were manufactured by Corning Inc. (Corning, NY, USA). Unless indicated, all other chemicals were purchased from Sigma-Aldrich (St. Louis, MO, USA). Briefly, IPEC-1 cells (passage 5–10) were grown in serial passage in uncoated plastic culture flasks (100 mm<sup>2</sup>) in DMEM-F12 containing 17.5 mM D-glucose, 2 mM Gln, 0.7 mM Arginine, 15 mM HEPES (pH 7.4), 5.0 % FBS, insulin (5.0  $\mu$ g/ml), transferrin (5.0  $\mu$ g/ml), selenium (5.0 ng/ml), epidermal growth factor (5.0  $\mu$ g/L), penicillin (50  $\mu$ g/ml), streptomycin (4.0  $\mu$ g/ml), and 0.25  $\mu$ g/ml amphotericin B (fungizone®). Medium was changed every 2 days. At confluence, cells were trypsinized and seeded in 6-well cell culture plates with approximately  $30 \times 10^4$  cells per well and maintained at 37°C in a 5% CO<sub>2</sub> incubator. After an overnight incubation, the cells were starved for 6 hrs in Arginine-free DMEM. The cells were cultured in medium containing 100  $\mu$ M Arginine, 350  $\mu$ M Arginine, 100  $\mu$ M Arginine+400  $\mu$ M L-NAME, 350  $\mu$ M Arginine+400  $\mu$ M L-NAME. The medium was changed every 2 days. The cells were collected for further research after 4 days' incubation.

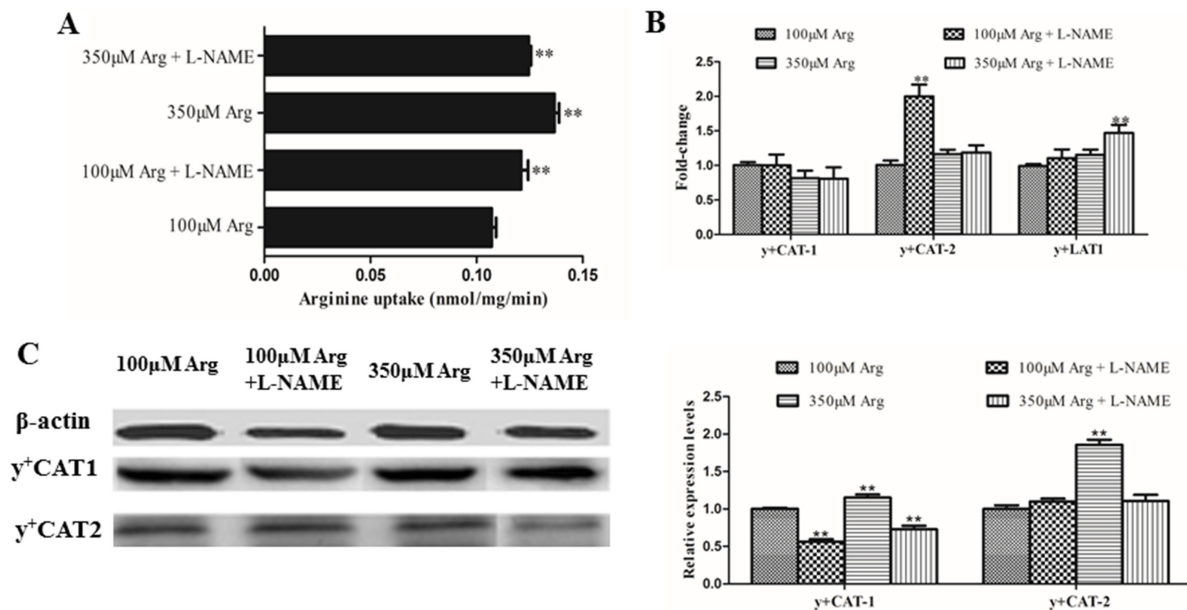

**Figure 3: Effects of inhibition of Arg-NO pathway on arginine transport rate.** (A) Effects of inhibition of Arg-NO pathway on arginine uptake. (B) The mRNA levels of  $\gamma$ -CAT-1,  $\gamma$ -CAT-2, and  $\gamma$ -LAT-1 were measured by RT-PCR, with  $\beta$ -actin used as the internal control. (C) Expression and relative protein levels of  $\gamma$ -CAT-1 and  $\gamma$ -CAT-2 was analyzed by western blotting, with  $\beta$ -actin used as the internal control. Cells were treated with 100  $\mu$ M Arg, 350  $\mu$ M Arg, 100  $\mu$ M Arg+400  $\mu$ M L-NAME, 350  $\mu$ M Arg+400  $\mu$ M L-NAME. Data are the mean  $\pm$  SEM of at least three independent experiments. \* $P < 0.5$  and \*\* $P < 0.01$ .

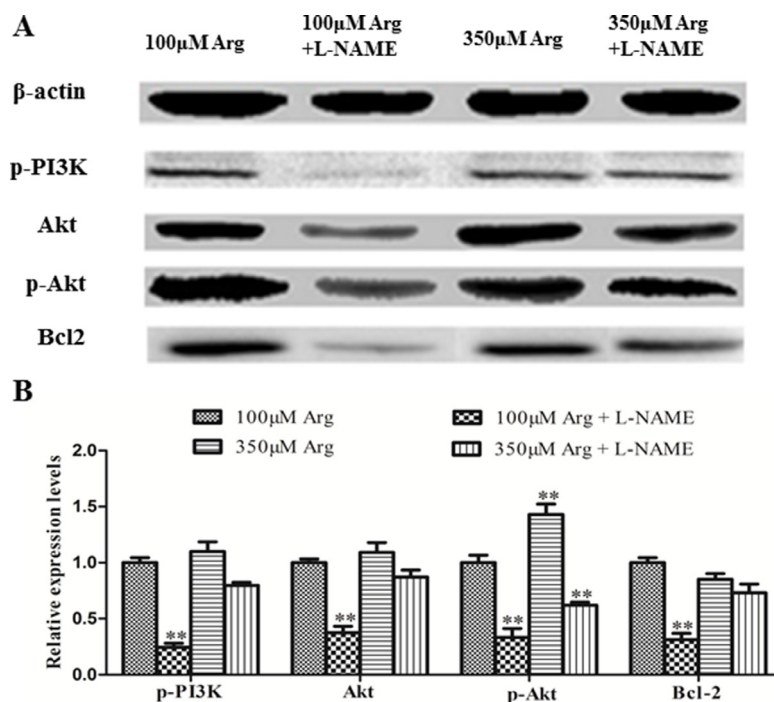

**Figure 4: Effects of inhibition of Arg-NO pathway on PI3K-Akt-Bcl2 pathway.** (A) Expressions of phosphorylated PI3K, Akt, phosphorylated Akt and Bcl2 were analyzed by western blotting, with  $\beta$ -actin used as the internal control. (B) Relative protein levels for phosphorylated PI3K, Akt, phosphorylated Akt and Bcl2. Cells were treated with 100  $\mu$ M Arg, 350  $\mu$ M Arg, 100  $\mu$ M Arg+400  $\mu$ M L-NAME, 350  $\mu$ M Arg+400  $\mu$ M L-NAME. Data are the mean  $\pm$  SEM of at least three independent experiments. \* $P$  < 0.5 and \*\* $P$  < 0.01.

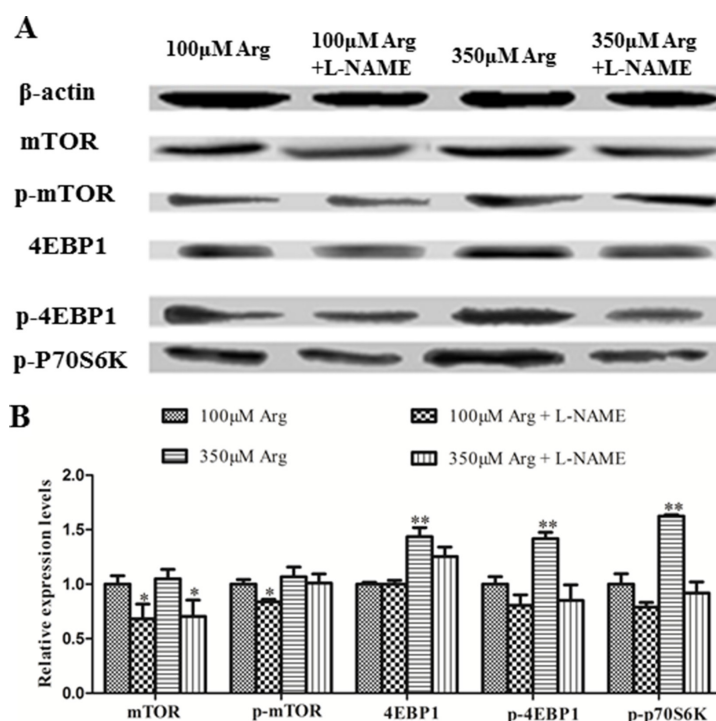

**Figure 5: Effects of inhibition of Arg-NO pathway on mTOR pathway.** (A) Expressions of 4EBP1, phosphorylated 4EBP1, phosphorylated p70S6 Kinase, mTOR, and phosphorylated mTOR were analyzed by western blotting, with  $\beta$ -actin used as the internal control. (B) Relative protein levels for 4EBP1, phosphorylated 4EBP1, phosphorylated p70S6 Kinase, mTOR, and phosphorylated mTOR. Cells were treated with 100  $\mu$ M Arg, 350  $\mu$ M Arg, 100  $\mu$ M Arg+400  $\mu$ M L-NAME, 350  $\mu$ M Arg+400  $\mu$ M L-NAME. Data are the mean  $\pm$  SEM of at least three independent experiments. \* $P$  < 0.5 and \*\* $P$  < 0.01.

**Table 1: Forward and reverse primers of  $\beta$ -actin,  $\gamma^+$ CAT-1,  $\gamma^+$ CAT-2, and  $\gamma^+$ LAT-1**

| Target Gene      | Primer Sequence (5' to 3')                          | Accession No.  |
|------------------|-----------------------------------------------------|----------------|
| $\beta$ -actin   | F: GGACCTGACCGACTACCTCA<br>R: CACAGCTTCTCCTTGATGTCC | XM_003124280.3 |
| $\gamma^+$ CAT-1 | F: TCTGGTCCTGGGCTTCATAA<br>R: ACCTTCGTGGCATTGTTTCAG | NM_001012613.1 |
| $\gamma^+$ CAT-2 | F: ACAACTGGCGAAGAAGTCCG<br>R: CTGCCGAGACCCCAAATAG   | NM_001110420.1 |
| $\gamma^+$ LAT-1 | F: GAGTGCCAGAACACAAACGA<br>R: TCCTCCATCTTCCAAATCCA  | NM_001110421.1 |

**Nitric oxide measurement**

We used Nitric Oxide Colorimetric Assay Kit to measure NO. And this kit provides an accurate, convenient measure of total nitrate/nitrite in a simple two-step process. The steps of measurement were performed following manufacturer's instructions for Nitric Oxide Colorimetric Assay Kit (BioVision, USA).

**EdU(5-Ethynyl -2'- deoxy uridine) measurement**

IPEC-1 cells grown on 96-well plates after 96 hours incubation were labeled with 50  $\mu$ M 5-ethynyl-2'-deoxyuridine (EdU; Invitrogen) for 30 minutes (pulse) before replacing with fresh medium. Cell fixation, permeabilization and EdU detection were performed following manufacturer's instructions for EdU kit (Invitrogen). Cells were measured using an inverted fluorescence microscope (DMI3000B, Leica, Germany)

**Flow cytometry**

The cells were handled and fixed for flow cytometry essentially as described earlier [26]. Briefly, about  $1 \times 10^6$  cells were pelleted at  $16\,000 \times g$  for 5 min. The supernatant was removed and 1 ml of 70% cold ethanol was slowly added during vigorous mixing. Samples were stored at 4°C. Samples were washed with PBS and resuspended in PBS containing 150  $\mu$ g/ml RNase A. DNA was stained with 50  $\mu$ g/ml propidium iodide for 1 h at room temperature. DNA content was then analyzed by FACS analysis on a Becton Dickinson FACSCanto.

**Arginine transport measurement**

After a 4-day period of culture, the medium was removed and the cells were rinsed three times with "transport buffer" (37°C) comprised of 137 mmol/L choline Cl, 10 mmol/L HEPES/Tris buffer (pH 7.4), 4.7 mmol/L KCl, 1.2 mmol/L  $MgSO_4$ , 1.2 mmol/L  $KH_2PO_4$ , 2.5 mmol/L  $CaCl_2$ . Transport was initiated by

simultaneously adding 1 ml of this buffer also containing L-[ $^3H$ ] arginineinine (2  $\mu$ Ci/ml, 5  $\mu$ mol/L) into each transport well (24 wells/plate). Cell culture plates were continuously shaken by an orbital shaker (1 Hz) during the 5 minutes uptake period. Uptake was arrested by discarding the transport buffer and washing cells three times with ice-cold transport buffer lacking  $^3H$ -labeled substrate. The  $^3H$  radioactivity, extracted from the cells with 0.5 ml 1N NaOH and neutralized with 0.25 ml of acetic acid, was assayed by liquid scintillation spectrometry. Protein in the NaOH extract was measured using the BCA method. Arginine uptake rates are expressed as nmoles of Arginine per minute per milligram of cell protein.

**Real-time PCR**

The protocol of total RNA extraction, quantification, cDNA synthesis and real-time PCR was adapted from the method of Li et al. [27 and 29]. Briefly, total RNA was isolated from cell samples by using the Trizol method. Real time PCR was carried out by using forward and reverse primers (Table 1) to amplify the target genes. For quantification, amplification efficiencies curves were constructed from serial 1:2 dilutions, and the  $2^{-\Delta\Delta CT}$  ( $\Delta\Delta CT = \{Ct(target) - Ct(relevant\ 18s\ or\ \beta\text{-actin})\} - \Delta Ct$  (average of control group)) method was used to calculate the mRNA expression of the target genes relative to housekeeping gene ( $\beta$ -actin or 18S).

**Western blotting analysis**

Frozen cell samples were collected as described by Tan et al. [14]. Protein concentrations of cell homogenates were measured by using the BCA method and bovine serum albumin as standard. All samples were adjusted to an equal concentration (50  $\mu$ g protein). The western blotting was conducted based on previous description [28]. The primary antibodies are 4EBP1 (1:1,000; Cell Signaling Technology), phosphorylated 4EBP1(Ser65) (1:1,000; Cell Signaling Technology), mTOR (1:1,000; Cell Signaling

Technology), phosphorylated mTOR (Ser2448) (1:1,000; Cell Signaling Technology), phosphorylated p70S6 kinase (Thr389) (1:1,000; Cell Signaling Technology), CAT-1(1:400; Santa Cruz Biotechnology, Dallas, TX), CAT-2(1:400; Santa Cruz Biotechnology, Dallas, TX), phosphorylated phosphatidylinositol 3-kinase (1:1,000; Cell Signaling Technology), Akt (Protein Kinase B; 1:1,000; Cell Signaling Technology), phosphorylated Akt [p-Akt (Ser 473); 1:1,000; Cell Signaling Technology), Bcl2 (1:1000; LifeSpan BioSciences, Inc), or  $\beta$ -actin (1:400; Santa Cruz Biotechnology, Dallas, TX). All protein measurements were normalized to  $\beta$ -actin.

### Statistical analysis

Results are expressed as Mean $\pm$ SEM. The statistical analysis was performed by one-way ANOVA using SPSS 17.0 (SPSS Inc., Chicago, IL, USA). Probability values < 0.05 were considered statistically significant.

### Abbreviations

NO: Nitric oxide; IPEC-1: Intestinal porcine epithelial cells; DMEM-F12: Dulbecco's modified Eagle's-F12 Ham medium; NOS: Nitric oxide synthase; mTOR: Mammalian target of rapamycin; PI3K: Phosphatidyl Inositol 3-kinase; L-NAME: L-nitro-arginine methylester; p70 S6: p70 ribosomal protein S6 kinase; 4E-BP1: Eukaryotic initiation factor 4E-binding protein 1; eNOS: Endothelial nitric oxide synthase; EdU: 5-ethynyl-2'-deoxyuridine.

### Authors' contributions

HX, LMZ, BT and YY designed the experiments; HX and LMZ conducted the experiments; BH, MMW and FYS help with some experiments; HX and LMZ analyzed the data; HX wrote the manuscript; WK, BT and YY revised the manuscript.

### ACKNOWLEDGMENTS

Hao Xiao and Liming Zeng equally contributed to this article. This study was in part supported by the National Basic Research Program of China (2013CB127302) National Natural Science Foundation of China (No. 31330075, 31272463, 31672433, 31560640) and Key Programs of frontier scientific research of the Chinese Academy of Sciences (QYZDY-SSW- SMC008).

### CONFLICTS OF INTEREST

None.

## REFERENCES

1. Tan B, Li XG, Kong X, Huang R, Ruan Z, Yao K, Deng Z, Xie M, Shinzato I, Yin Y, Wu G. Dietary L-arginine supplementation enhances the immune status in early-weaned piglets. *Amino Acids*. 2009; 37:323–331.
2. Tan B, Yin Y, Liu Z, Li X, Xu H, Kong X, Huang R, Tang W, Shinzato I, Smith SB, Wu G. Dietary L-arginine supplementation increases muscle gain and reduces body fat mass in growing-finishing pigs. *Amino Acids*. 2009; 37:169–175.
3. Tan B, Yin Y, Kong X, Li P, Li X, Gao H, Li X, Huang R, Wu G. L-Arginine stimulates proliferation and prevents endotoxin-induced death of intestinal cells. *Amino Acids*. 2010; 38:1227–1235.
4. Tan B, Yin Y, Liu Z, Tang W, Xu H, Kong X, Li X, Yao K, Gu W, Smith SB, Wu G. Dietary L-arginine supplementation differentially regulates expression of lipid-metabolic genes in porcine adipose tissue and skeletal muscle. *J Nutr Biochem*. 2011; 22:441–445.
5. Tan B, Li X, Wu G, Kong X, Liu Z, Li T, Yin Y. Dynamic changes in blood flow and oxygen consumption in the portal-drained viscera of growing pigs receiving acute administration of (L)-arginine. *Amino Acids*. 2012; 43:2481–2489.
6. Corl BA, Odle J, Niu X, Moeser AJ, Gatlin LA, Phillips OT, Blikslager AT, Rhoads JM. Arginine activates intestinal p70(S6k) and protein synthesis in piglet rotavirus enteritis. *J Nutr*. 2008; 138:24–29.
7. Rhoads JM, Chen W, Gookin J, Wu GY, Fu Q, Blikslager AT, Rippe RA, Argenzio RA, Cance WG, Weaver EM, Romer LH. Arginine stimulates intestinal cell migration through a focal adhesion kinase dependent mechanism. *Gut*. 2004; 53:514–522.
8. Ban H, Shigemitsu K, Yamatsuji T, Haisa M, Nakajo T, Takaoka M, Nobuhisa T, Gunduz M, Tanaka N, Naomoto Y. Arginine and Leucine regulate p70 S6 kinase and 4E-BP1 in intestinal epithelial cells. *Int J Mol Med*. 2004; 13:537–543.
9. Kong X, Tan B, Yin Y, Gao H, Li X, Jaeger LA, Bazer FW, Wu G. L-Arginine stimulates the mTOR signaling pathway and protein synthesis in porcine trophectoderm cells. *J Nutr Biochem*. 2012; 23:1178–1183.
10. Jobgen WS, Fried SK, Fu WJ, Meininger CJ, Wu G. Regulatory role for the arginine-nitric oxide pathway in metabolism of energy substrates. *J Nutr Biochem*. 2006; 17:571–588.
11. Rhoads JM, Liu Y, Niu X, Surendran S, Wu G. Arginine stimulates cdx2-transformed intestinal epithelial cell migration via a mechanism requiring both nitric oxide and phosphorylation of p70 S6 kinase. *J Nutr*. 2008; 138:1652–1657.
12. Bauchart-Thevret C, Cui L, Wu G, Burrin DG. Arginine-induced stimulation of protein synthesis and survival in IPEC-J2 cells is mediated by mTOR but not nitric oxide.

- Am J Physiol Endocrinol Metab. 2010; 299:E899–909.
13. Marc Rhoads J, Wu G. Glutamine, arginine, and leucine signaling in the intestine. *Amino acids*. 2009; 37:111–122.
  14. Tan B, Xiao H, Xiong X, Wang J, Li G, Yin Y, Huang B, Hou Y, Wu G. L-arginine improves DNA synthesis in LPS-challenged enterocytes. *Front Biosci (Landmark Ed)*. 2015; 20:989–1003.
  15. Ren W, Chen S, Yin J, Duan J, Li T, Liu G, Feng Z, Tan B, Yin Y, Wu G. Dietary arginine supplementation of mice alters the microbial population and activates intestinal innate immunity. *J Nutr*. 2014; 144:988–995.
  16. Lenaerts K, Renes J, Bouwman FG, Noben JP, Robben J, Smit E, Mariman EC. Arginine deficiency in preconfluent intestinal Caco-2 cells modulates expression of proteins involved in proliferation, apoptosis, and heat shock response. *Proteomics*. 2007; 7:565–577.
  17. Sarbassov DD, Ali SM, Sabatini DM. Growing roles for the mTOR pathway. *Curr Opin Cell Biol*. 2005; 17:596–603.
  18. Gross A, McDonnell JM, Korsmeyer SJ. BCL-2 family members and the mitochondria in apoptosis. *Genes Dev*. 1999; 13:1899–1911.
  19. Choi BM, Pae HO, Jang SI, Kim YM, Chung HT. Nitric oxide as a pro-apoptotic as well as anti-apoptotic modulator. *J Biochem Mol Biol*. 2002; 35:116–126.
  20. Wu G, Knabe DA. Arginine synthesis in enterocytes of neonatal pigs. *Am J Physiol*. 1995; 269:R621–629.
  21. Grillo MA, Lanza A, Colombatto S. Transport of amino acids through the placenta and their role. *Amino acids*. 2008; 34:517–523.
  22. Schwartz IF, Ingbir M, Chernichovski T, Reshef R, Chernin G, Litvak A, Weinstein T, Levo Y, Schwartz D. Arginine uptake is attenuated, through post-translational regulation of cationic amino acid transporter-1, in hyperlipidemic rats. *Atherosclerosis*. 2007; 194:357–363.
  23. Rhoads JM, Corl BA, Harrell R, Niu X, Gatlin L, Phillips O, Blikslager A, Moeser A, Wu G, Odle J. Intestinal ribosomal p70(S6K) signaling is increased in piglet rotavirus enteritis. *Am J Physiol Gastrointest Liver Physiol*. 2007; 292:G913–922.
  24. Ramanathan A, Schreiber SL. Direct control of mitochondrial function by mTOR. *Proc Natl Acad Sci USA*. 106:22229–22232.
  25. Visigalli R, Barilli A, Bussolati O, Sala R, Gazzola GC, Parolari A, Tremoli E, Simon A, Closs EI, Dall'Asta V. Rapamycin stimulates arginine influx through CAT2 transporters in human endothelial cells. *Biochim Biophys Acta*. 2007; 1768:1479–1487.
  26. Shao FY, Du ZY, Ma DL, Chen WB, Fu WY, Ruan BB, Rui W, Zhang JX, Wang S, Wong NS, Xiao H, Li MM, Liu X, et al. B5, a thioredoxin reductase inhibitor, induces apoptosis in human cervical cancer cells by suppressing the thioredoxin system, disrupting mitochondrion-dependent pathways and triggering autophagy. *Oncotarget*. 2015; 6:30939–56. doi: 10.18632/oncotarget.5132.
  27. Li G, Li J, Tan B, Wang J, Kong X, Guan G, Li F, Yin Y. Characterization and Regulation of the Amino Acid Transporter SNAT2 in the Small Intestine of Piglets. *PLoS one*. 2015; 10:e0128207.
  28. Xiao H, Tan BE, Wu MM, Yin YL, Li TJ, Yuan DX, Li L. Effects of composite antimicrobial peptides in weanling piglets challenged with deoxynivalenol: II. Intestinal morphology and function. *J Anim Sci*. 2013; 91:4750–4756.
